# Supplementary material for: A role for the ribosome-associated complex in activation of the IRE1 branch of UPR
Source: PubMed Central journal article supplement (PMC8372851; doi:10.1016/j.celrep.2021.109366), 2021-07-13
Supplement: NIHMS1724262-supplement-1.pdf [file NIHMS1724262-supplement-1.pdf]

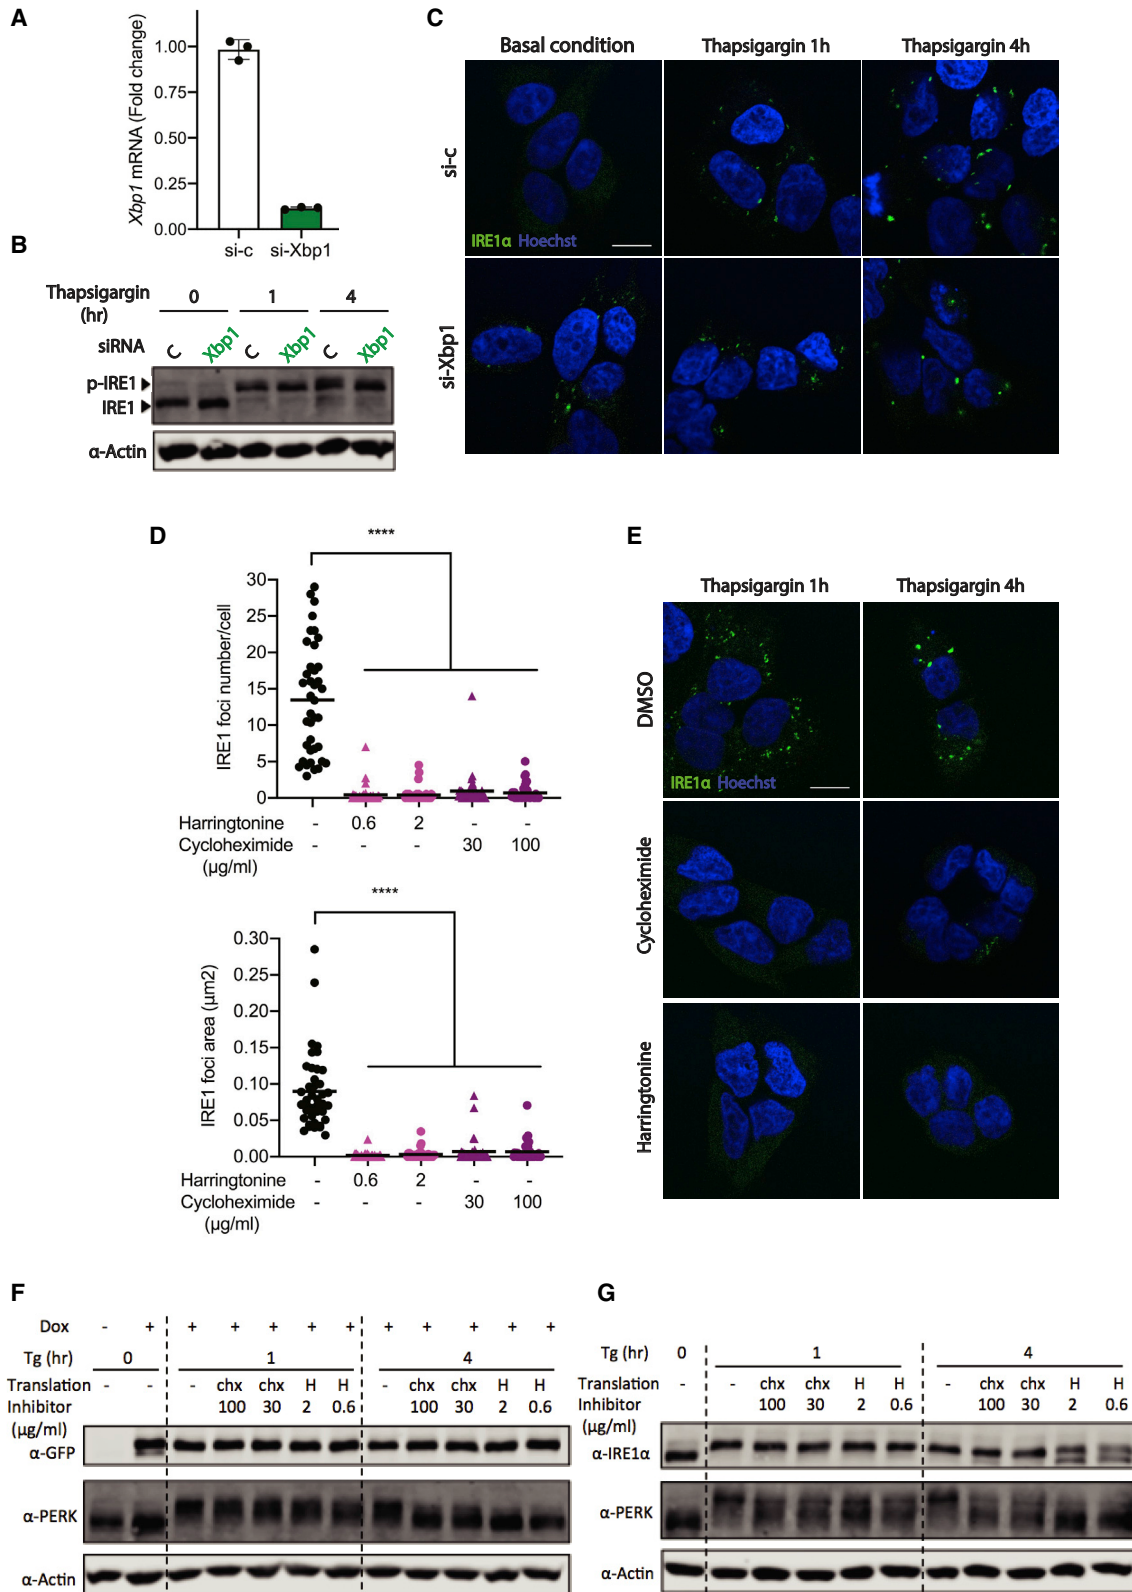

Figure S5. IRE1 $\alpha$  clustering is translation dependent, but *Xbp1* independent (corrected)

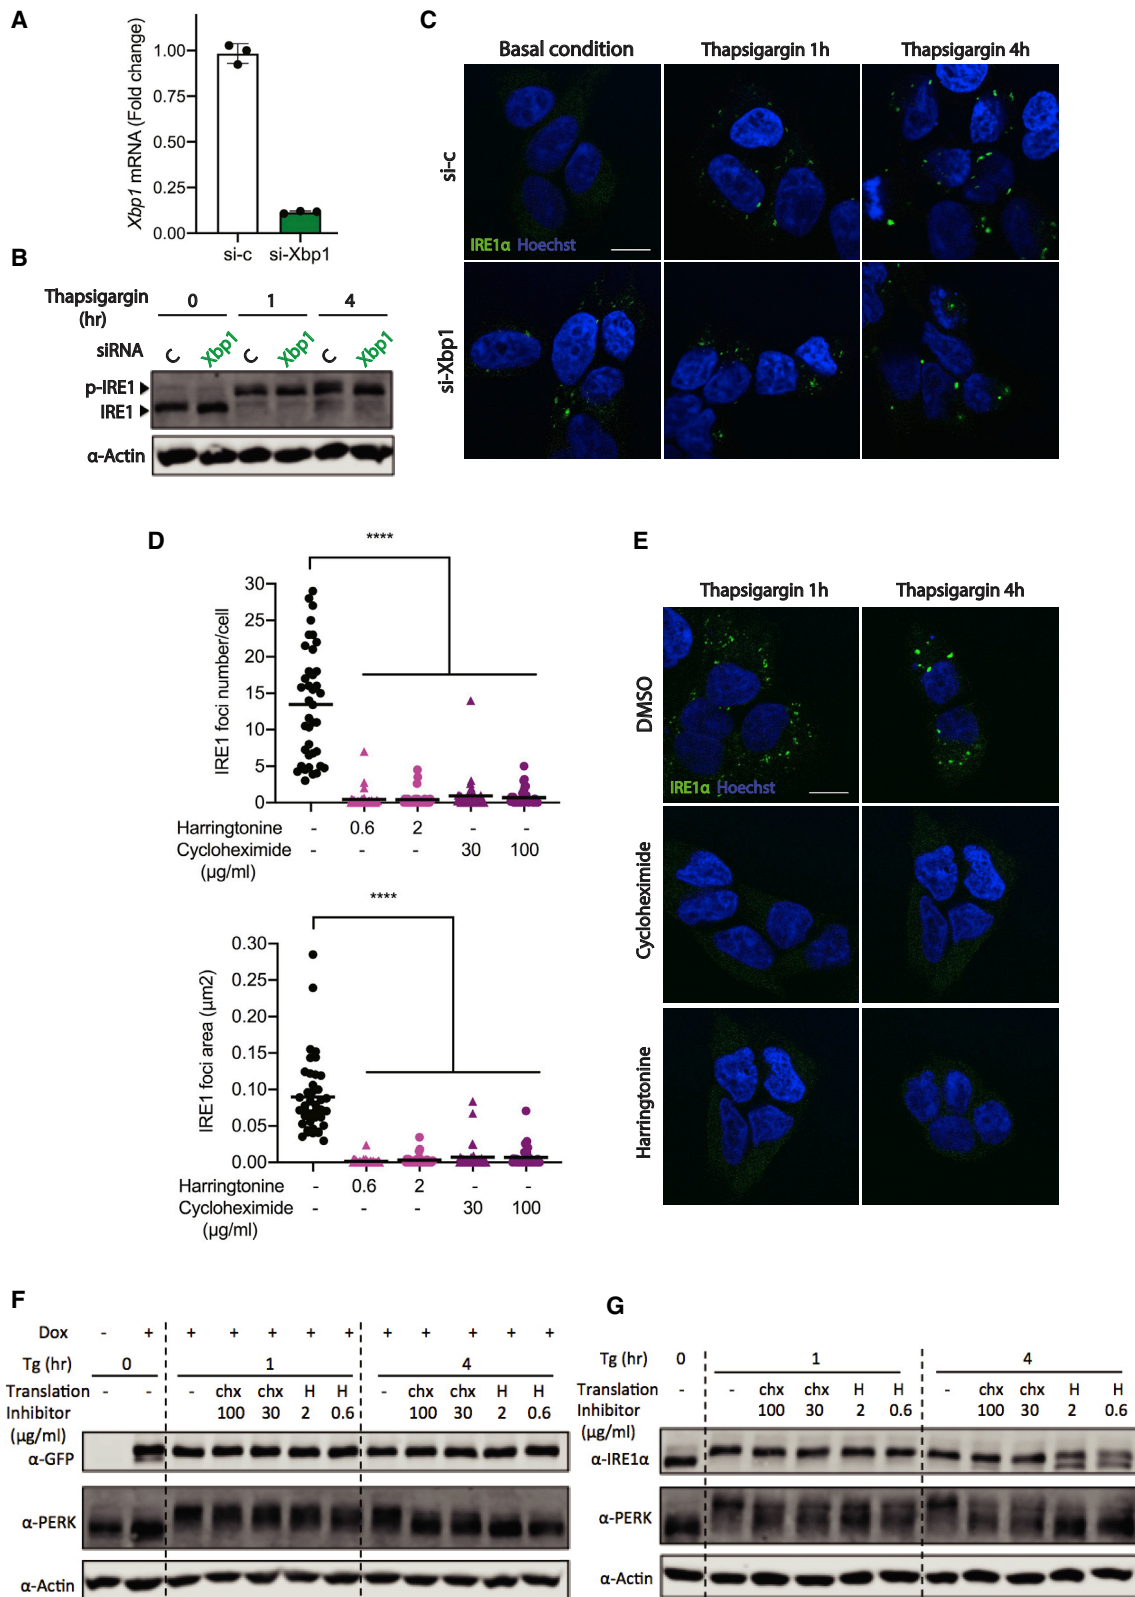

Figure S5. IRE1 $\alpha$  clustering is translation dependent, but *Xbp1* independent (original)
